# Supplementary material for: Hierarchically porous TiO2microspheres as a high performance anode for lithium-ion batteries
Source: Royal Society of Chemistry journal article supplement (doi:10.1039/c3ta14178k), 2013-10-31
Supplement: c3ta14178k.pdf [file c3ta14178k.pdf]

## Supporting Information

# Hierarchically porous $\text{TiO}_2$ microspheres as a high performance anode for lithium-ion batteries †

Tongbin Lan, Yubin Liu, Jie Dou, Zhensheng Hong, Mingdeng Wei\*

Institute of Advanced Energy Materials, Fuzhou University, Fuzhou, Fujian 350002, China

E-mail: wei-mingdeng@fzu.edu.cn

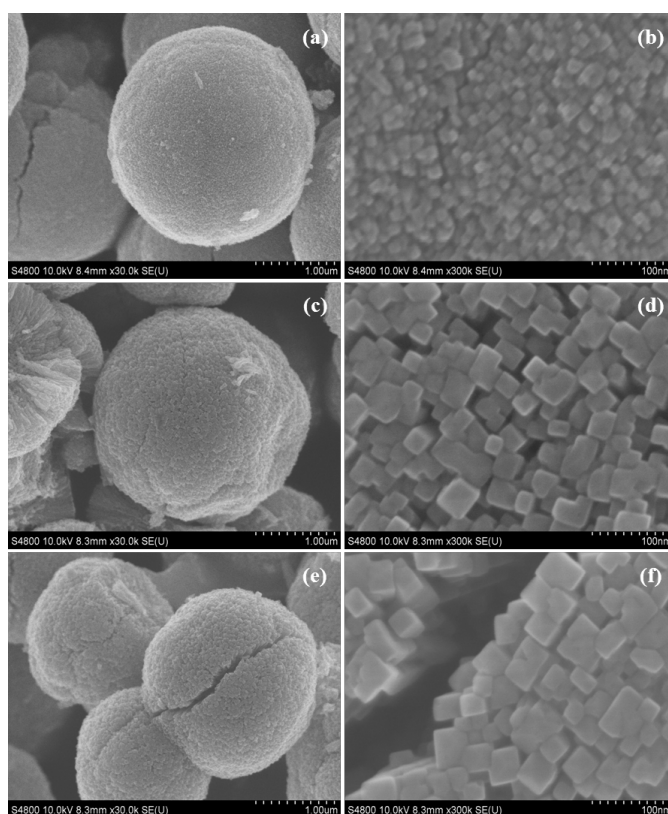

20 **Fig. S1** SEM images of the surface of hierarchically porous rutile  $\text{TiO}_2$  microspheres synthesized at 180 °C for (a-b) 3, (c-d) 24 and (e-f) 48 h.

25

30

35

5

10

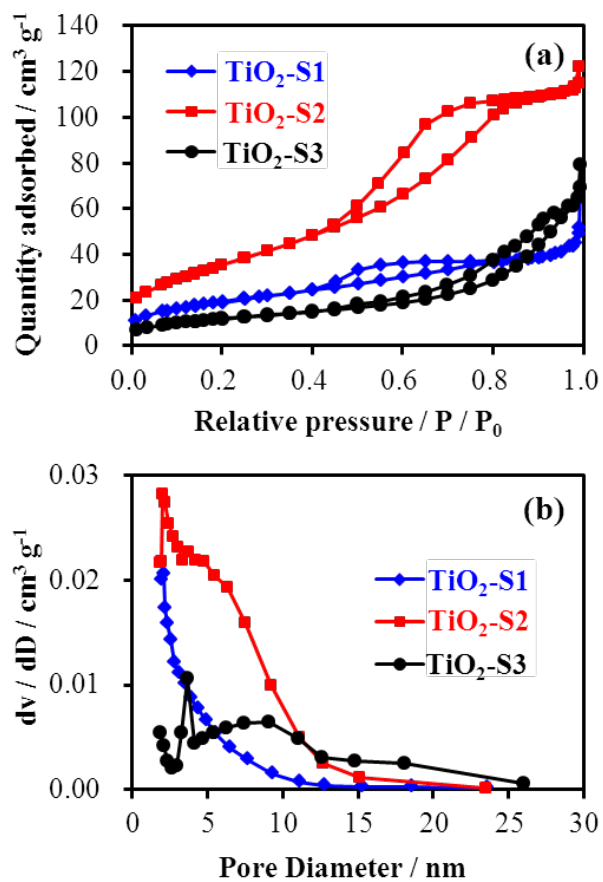

Fig. S2 (a) N<sub>2</sub> adsorption–desorption isotherms and (b) the BJH pore size distributions from the adsorption branch for the samples of TiO<sub>2</sub>-S1, TiO<sub>2</sub>-S2 and TiO<sub>2</sub>-S3.

15

20

25

30

35

5

10

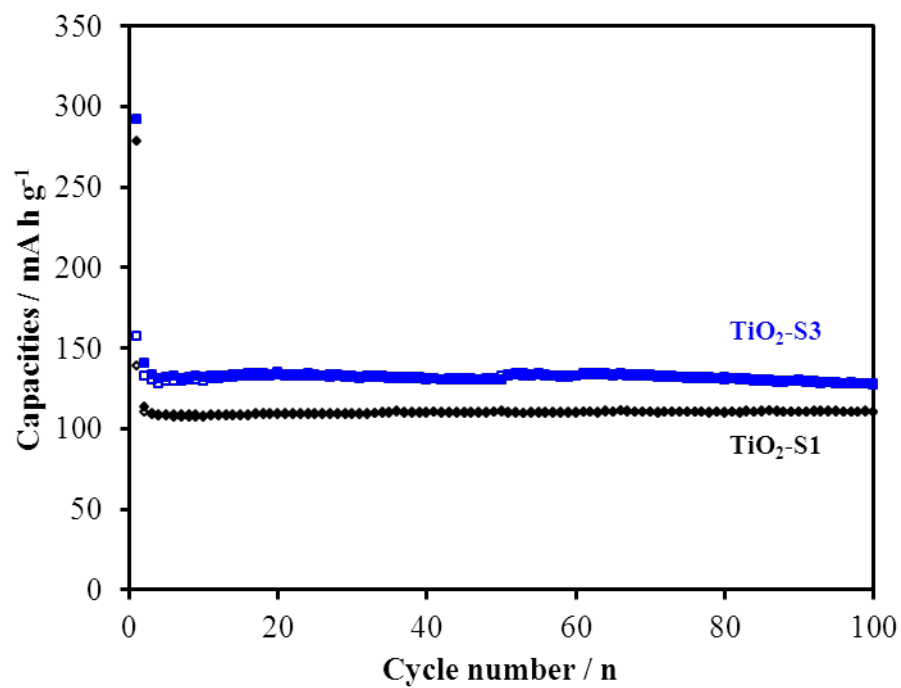

15

**Fig. S3** Cycling performances of the cells made of TiO<sub>2</sub>-S1 and TiO<sub>2</sub>-S2 at a current rate of 1 C, respectively. The voltage range is 3.0-1.0 V.

20

25

30

35

40

45
